# Supplementary material
Source: publisher figshare collection journal article supplement (https://acs.figshare.com/ndownloader/files/3585723)
Supplement: Supplementary file 1 [file 3585723]

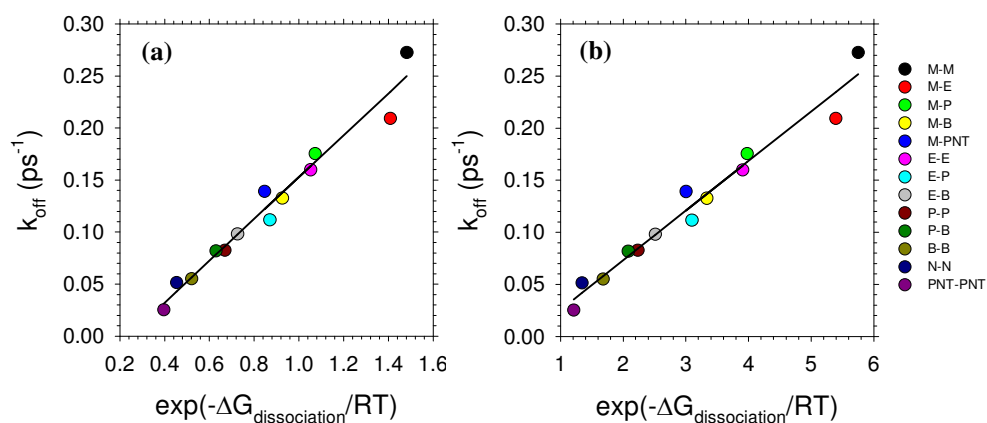

**Figure S1.** The dissociation kinetics of the 13 alkane-pairs. Correlations between the computed dissociation rate constant ( $k_{\text{off}}$ ) and the free energy change for dissociation ( $\Delta G_{\text{dissociation}}$ ) computed using the center-of-mass reaction coordinate. In panel (a), the free energy changes are calculated from association constants, ' $K_{\text{eq}}$ ', which have been defined and calculated according to the procedure outlined in Reference 15 of the main text. In panel (b), the free energy changes are calculated from association constants, ' $K_2$ ', which have been defined and calculated according to the procedures outlined in References 26 and 27 of the main text.  $r^2$  values for the linear fits are both 0.966.
